# Supplementary material for: LY6E: a conductor of malignant tumor growth through modulation of the PTEN/PI3K/Akt/HIF-1 axis
Source: PubMed Central journal article supplement (PMC5323196; doi:10.18632/oncotarget.11670), 2016-08-29
Supplement: oncotarget-07-65837-s001.pdf [file oncotarget-07-65837-s001.pdf]

## LY6E: a conductor of malignant tumor growth through modulation of the PTEN/PI3K/Akt/HIF-1 axis

### SUPPLEMENTARY FIGURES

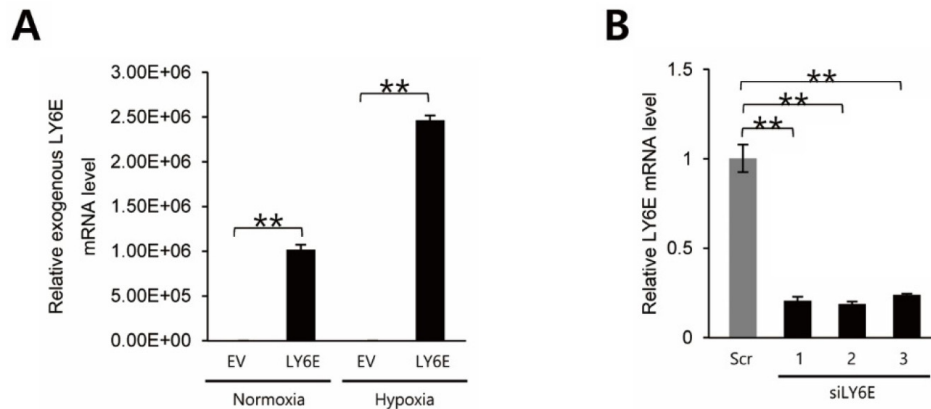

**Supplementary Figure S1: Overexpression and knockdown of LY6E.** **A.** HeLa cells were transiently transfected with pcDNA4/LY6E (LY6E) or pcDNA4/myc-His A (EV), cultured under normoxic or hypoxic conditions for 24 h, and subjected to qRT-PCR using primers for exogenous *LY6E*. **B.** MCF7 cells were treated with scramble-siRNA (Scr) or LY6E-siRNA (siLY6E-1, 2, 3), cultured under hypoxic conditions for 24 h, and subjected to qRT-PCR to quantify the mRNA levels of LY6E and HIF-1 $\alpha$  genes. Mean  $\pm$  s.d. n = 4, \*\* $P$  < 0.01 (Student's *t*-test).

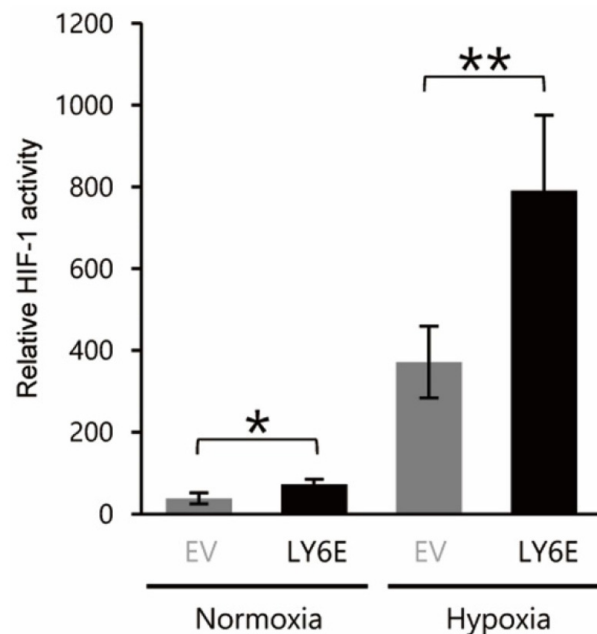

**Supplementary Figure S2: Activation of HIF-1 by LY6E overexpression.** MDA-MB-231/5HRE-Luc cells were transfected with pcDNA4/LY6E (LY6E) or pcDNA4/myc-His A (EV), cultured under normoxic or hypoxic conditions for 48 h, and subjected to a dual luciferase assay. Mean  $\pm$  s.d. n = 4, \* $P$  < 0.05, \*\* $P$  < 0.01 (Student's *t*-test).

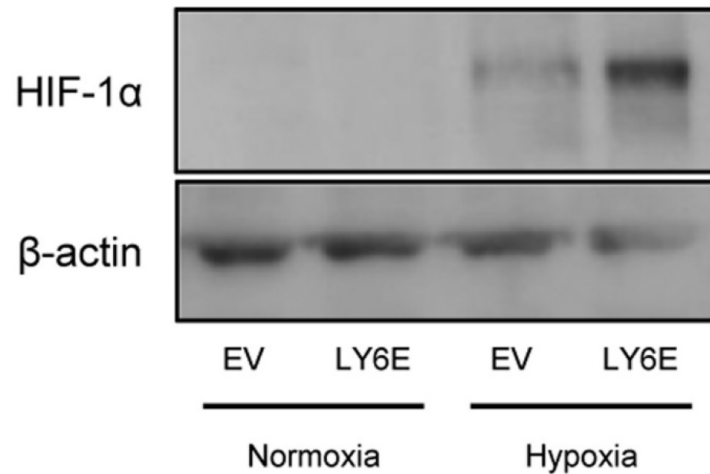

**Supplementary Figure S3: LY6E-mediated upregulation of HIF-1 $\alpha$  protein levels.** MDA-MB-231 and A549 cells were transiently transfected with either pcDNA4/LY6E (LY6E) or pcDNA4/myc-His A (EV), cultured under the indicated oxygen conditions, and subjected to Western blotting for the indicated proteins.

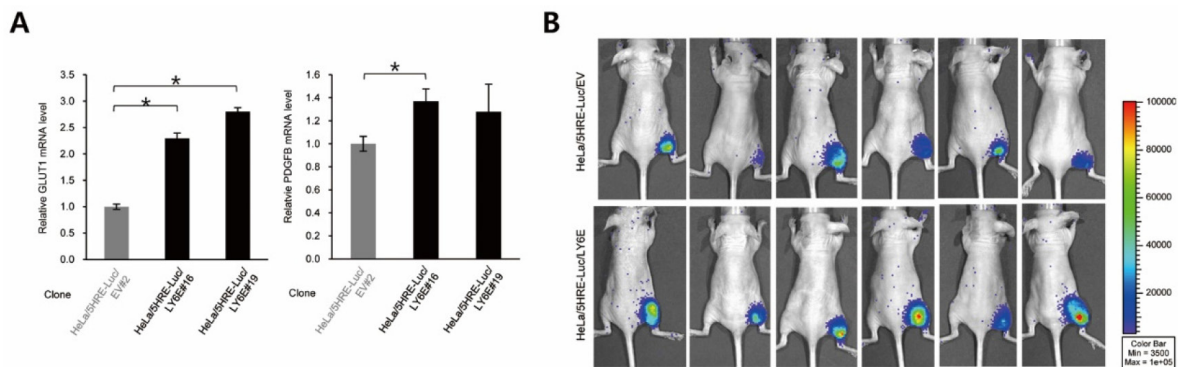

**Supplementary Figure S4: LY6E-mediated activation of HIF-1 and pro-angiogenic characteristics of HeLa/5HRE-Luc/LY6E stable transfectants.** **A.** Stable transfectants of HeLa/5HRE-Luc/EV and HeLa/5HRE-Luc/LY6E cells were cultured under hypoxic conditions and subjected to qRT-PCR for the indicated genes. Mean  $\pm$  s.d. n = 4, \* $P$  < 0.05 (Student's  $t$ -test). **B.** *In vivo* bioluminescence images were acquired 23 days after the transplantation of HeLa/5HRE-Luc/EV#2 and HeLa/5HRE-Luc/LY6E#16 cells into 6 nude mice per one cell line to monitor HIF-1 activities in tumor xenografts.

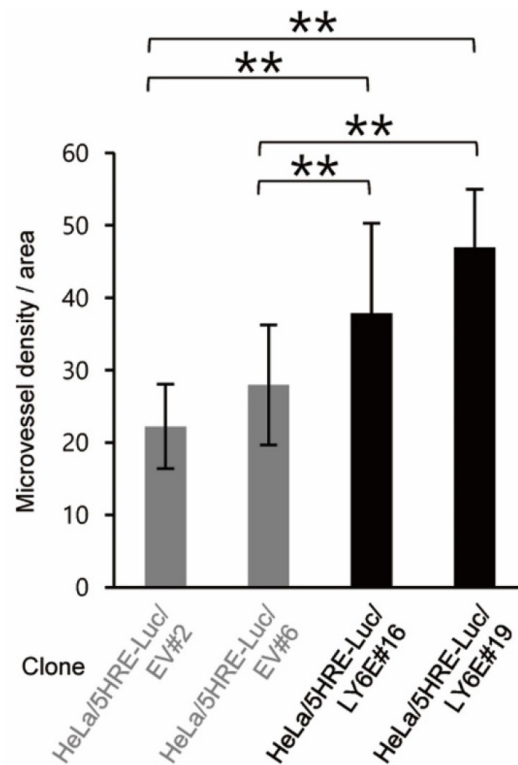

**Supplementary Figure S5: Increases in microvessel density by the forced expression of LY6E.** Tumor xenografts of the indicated cells were surgically excised 37 days after cancer cell transplantation and subjected to an immunohistochemical analysis using an anti-CD31 antibody. Microvessel density detected as CD31-positive cells per one field was quantified (3 fields in each of 10 representative xenografts, n = 30). Mean ± s.d. **\*\*P < 0.01** (Student's *t*-test).

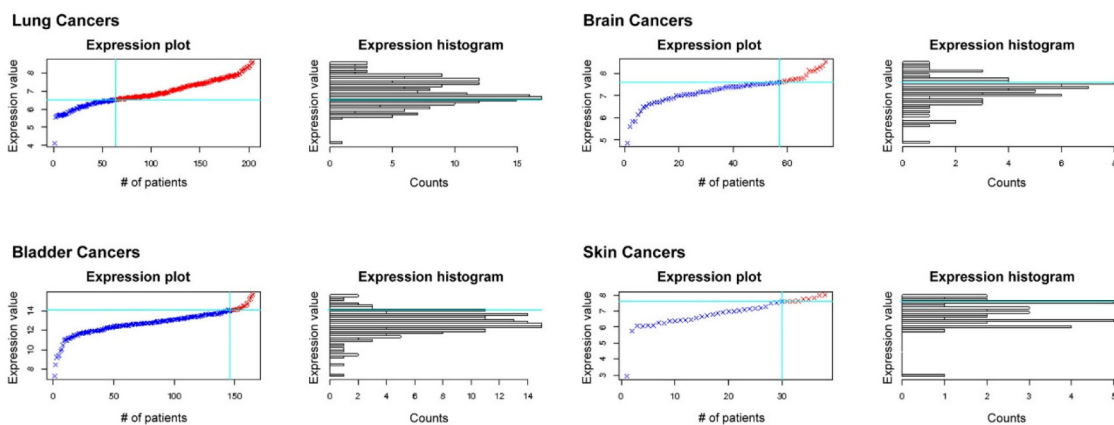

**Supplementary Figure S6: Expression plots and expression histograms associated with the PrognScan database-based analyses in Figure 5A.** Cutoff values between high and low expression levels of intratumoral LY6E are represented as cyan lines in each expression plot and expression histogram of PrognScan database-based Kaplan-Meier analysis of the overall survival of 204 lung, 165 bladder, 74 brain, and 38 skin cancer patients in Figure 5A.

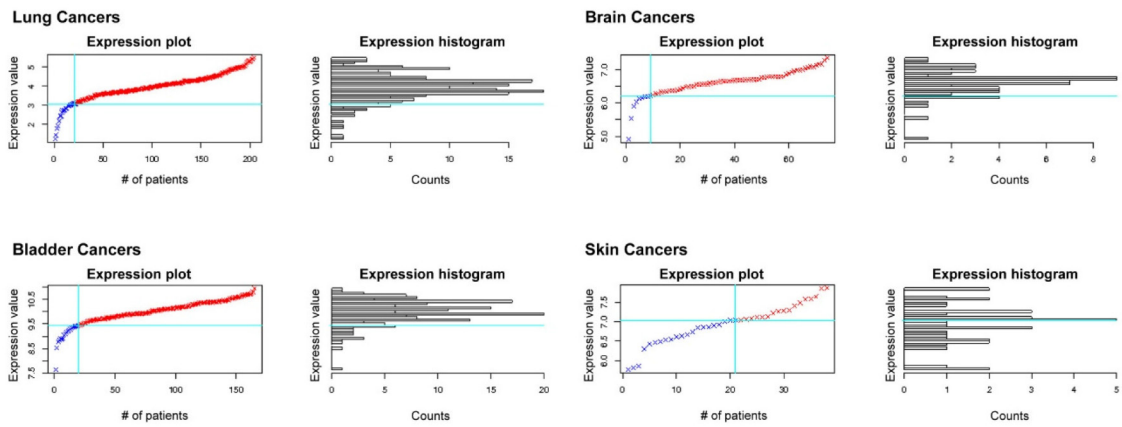

**Supplementary Figure S7: Expression plots and expression histograms associated with the PrognScan database-based analyses in Figure 5D.** Cutoff values between high and low expression levels of intratumoral PTEN are represented as cyan lines in each expression plot and expression histogram of PrognScan database-based Kaplan-Meier analysis of the overall survival of 204 lung, 165 bladder, 74 brain, and 38 skin cancer patients in Figure 5D.
